# Supplementary material
Source: publisher figshare collection journal article supplement (https://tandf.figshare.com/articles/dataset/_/19845310)
Supplement: Supplementary file 1 [file 1]

**Supplementary Table 3.** Summary of patients undergoing radical surgery after first-line chemotherapy

* At data cut-off

** Schedule: Oxaliplatin 85 mg/m2 + Calcium Levofolinate 200 mg/m2 + Irinotecan 180 mg/m2 + 5-fluorouracil 2400 mg/m2 continuous infusion 46 h d1 q14.

*** Schedule: Capecitabine 1250 mg/m2, bid, d1-14 q21

**** Schedule: Gemcitabine 1000mg/m2 d1, d8, d15 q28

| Case (#) | First-line treatment regimen | PFS first-line (weeks) | OS first-line (weeks) | Adjuvant treatment | Living status* |
| --- | --- | --- | --- | --- | --- |
| 1 | FFN | 53.1 | 85.4 | mFOLFIRINOX** | Alive |
| 2 | FFN | 62.4 | 62.4 | - | Dead |
| 3 | FFN | 83 | 159.7 | Capecitabine*** | Dead |
| 4 | FFN | 78.1 | 100.4 | mFOLFIRINOX** | Alive |
| 5 | NabGem | 42.8 | 84.6 | - | Dead |
| 6 | NabGem | 91.4 | 109.6 | Gemcitabine**** | Dead |
| 7 | NabGem | 94.4 | 157.7 | - | Dead |
